# Supplementary material for: A novel approach to a substituted 1,3-selenazole core as a precursor of electron rich olefins: diselenadiazafulvalene and azino-diselenadiazafulvalene
Source: Royal Society of Chemistry journal article supplement (doi:10.1039/b302942p), 2003-01-01
Supplement: b302942p.pdf [file b302942p.pdf]

# Supplementary Material (ESI) for New Journal of Chemistry  
# This journal is © The Royal Society of Chemistry and  
# The Centre National de la Recherche Scientifique, 2003

### Supplementary information

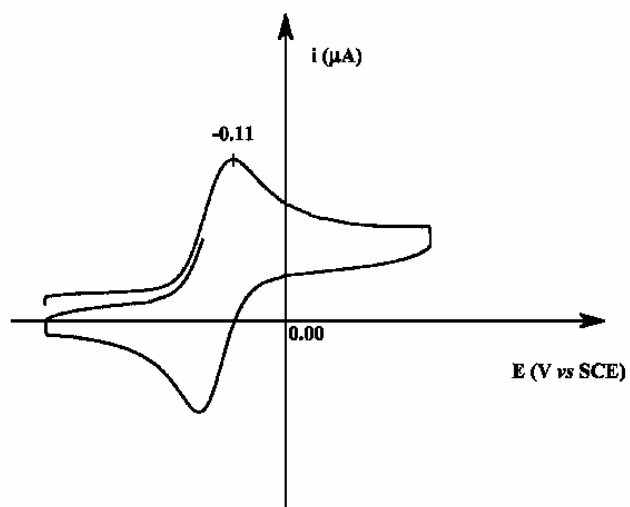

Cyclic voltammogram of DSeDAF **10**, Bu<sub>4</sub>NPF<sub>6</sub> (1 M), CH<sub>2</sub>Cl<sub>2</sub>, Pt working electrode, scanning rate 0.1 V/s

# Supplementary Material (ESI) for New Journal of Chemistry  
# This journal is © The Royal Society of Chemistry and  
# The Centre National de la Recherche Scientifique, 2003

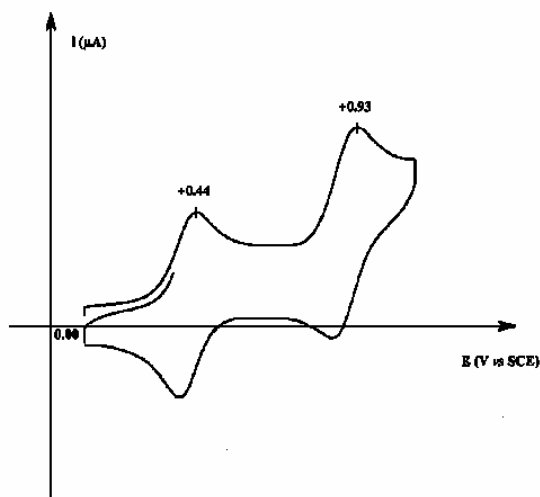

Cyclic voltammogram of azino-DSeDAF **12**, Bu<sub>4</sub>NPF<sub>6</sub> (1 M), MeCN, Pt working electrode, scanning rate 0.1 V/s
